# Supplementary material for: Oxidized plasma albumin promotes platelet-endothelial crosstalk and endothelial tissue factor expression
Source: PubMed Central journal article supplement (PMC4764952; doi:10.1038/srep22104), 2016-02-24
Supplement: srep22104-s1.pdf [file srep22104-s1.pdf]

**Supplementary Information**

Oxidized plasma albumin promotes platelet-endothelial crosstalk and  
endothelial tissue factor expression

Lisa Pasterk, Sandra Lemesch, Bettina Leber, Markus Trieb, Sanja Curcic, Vanessa Stadlbauer,  
Rufina Schuligoi, Rudolf Schicho, Akos Heinemann, Gunther Marsche

**Supplementary Figure**

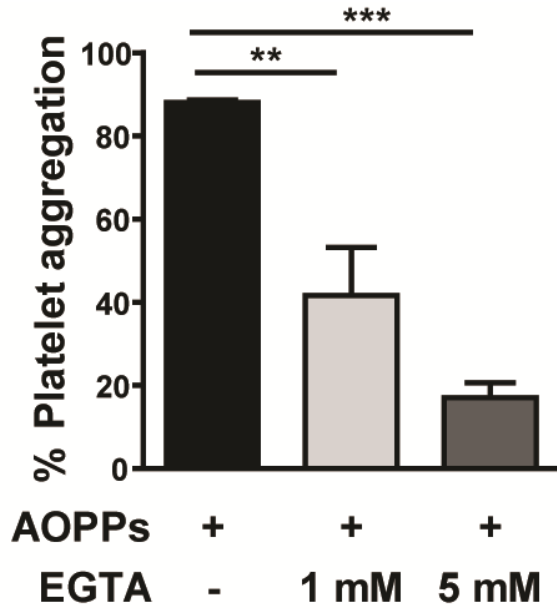

**EGTA decreases AOPPs induced platelet aggregation.** Platelets were preincubated with EGTA at indicated concentrations and aggregation was induced with AOPPs (100  $\mu\text{g}/\text{mL}$ ). All values are shown as mean + SEM. \*\* $P < 0.01$  and \*\*\* $P < 0.001$  as indicated.
